# Supplementary material for: Chromoanagenesis Event Underlies a de novo Pericentric and Multiple Paracentric Inversions in a Single Chromosome Causing Coffin–Siris Syndrome
Source: PubMed Central journal article supplement (PMC8427664; doi:10.3389/fgene.2021.708348), 2021-08-26

Supplemental Figure 1:

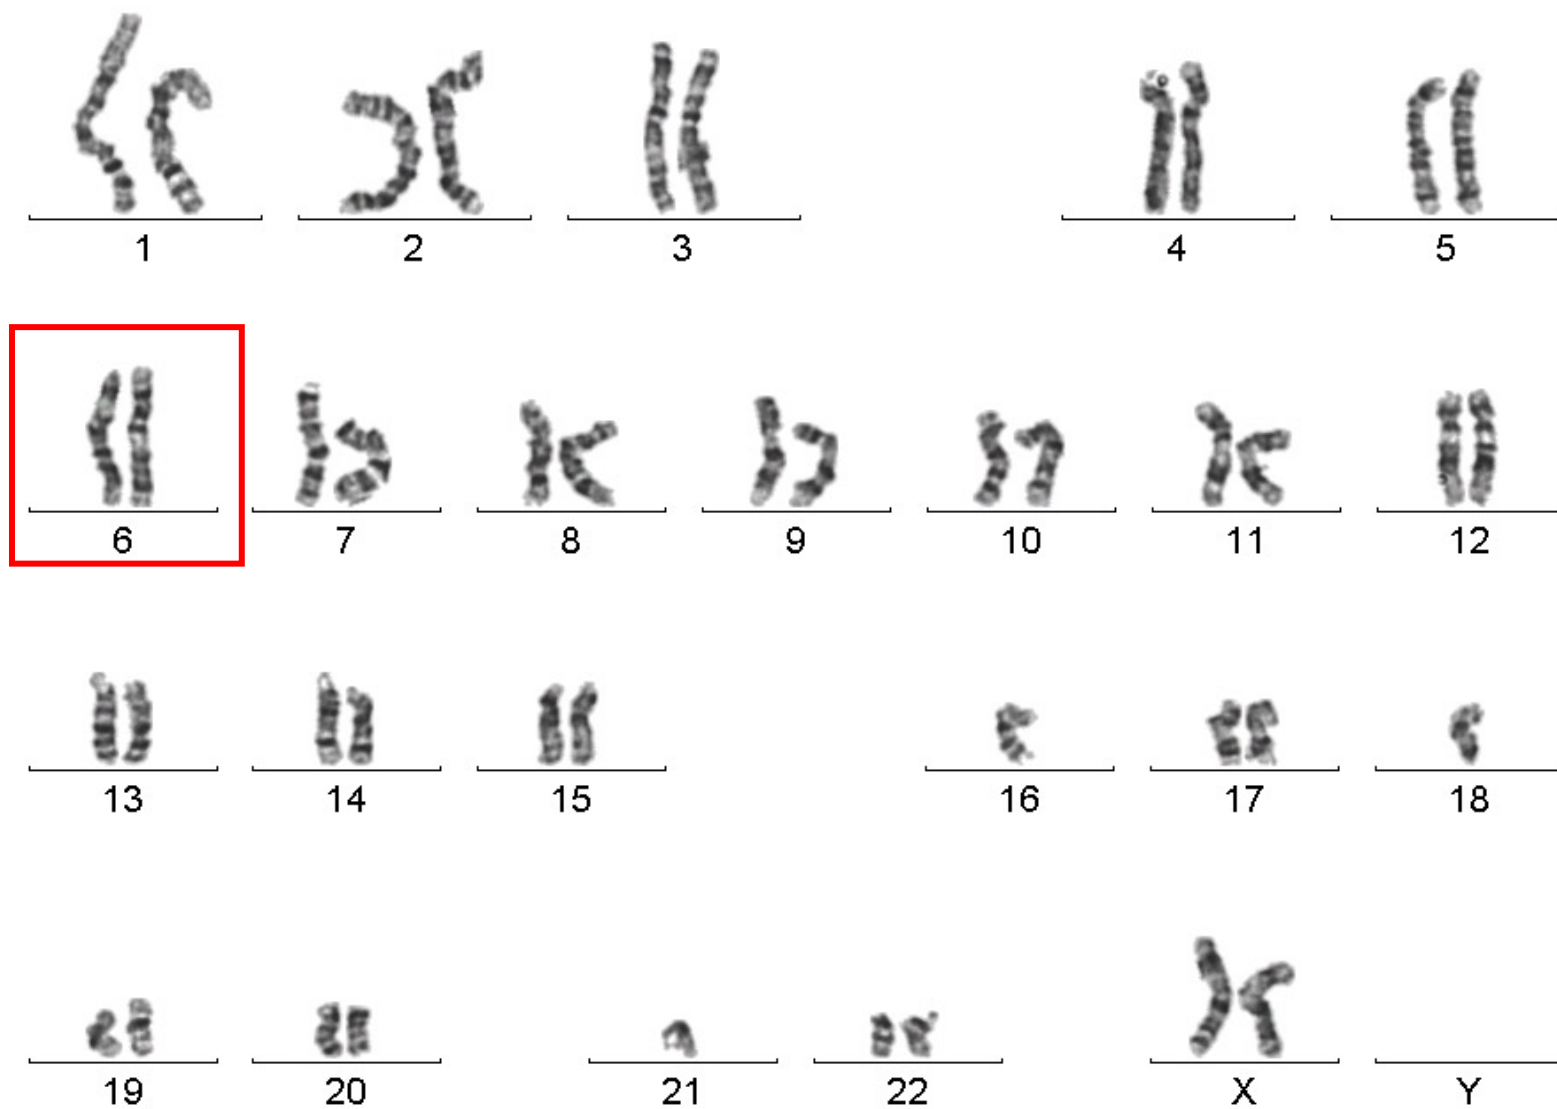

BAB12386

**Supplemental Figure 2:**

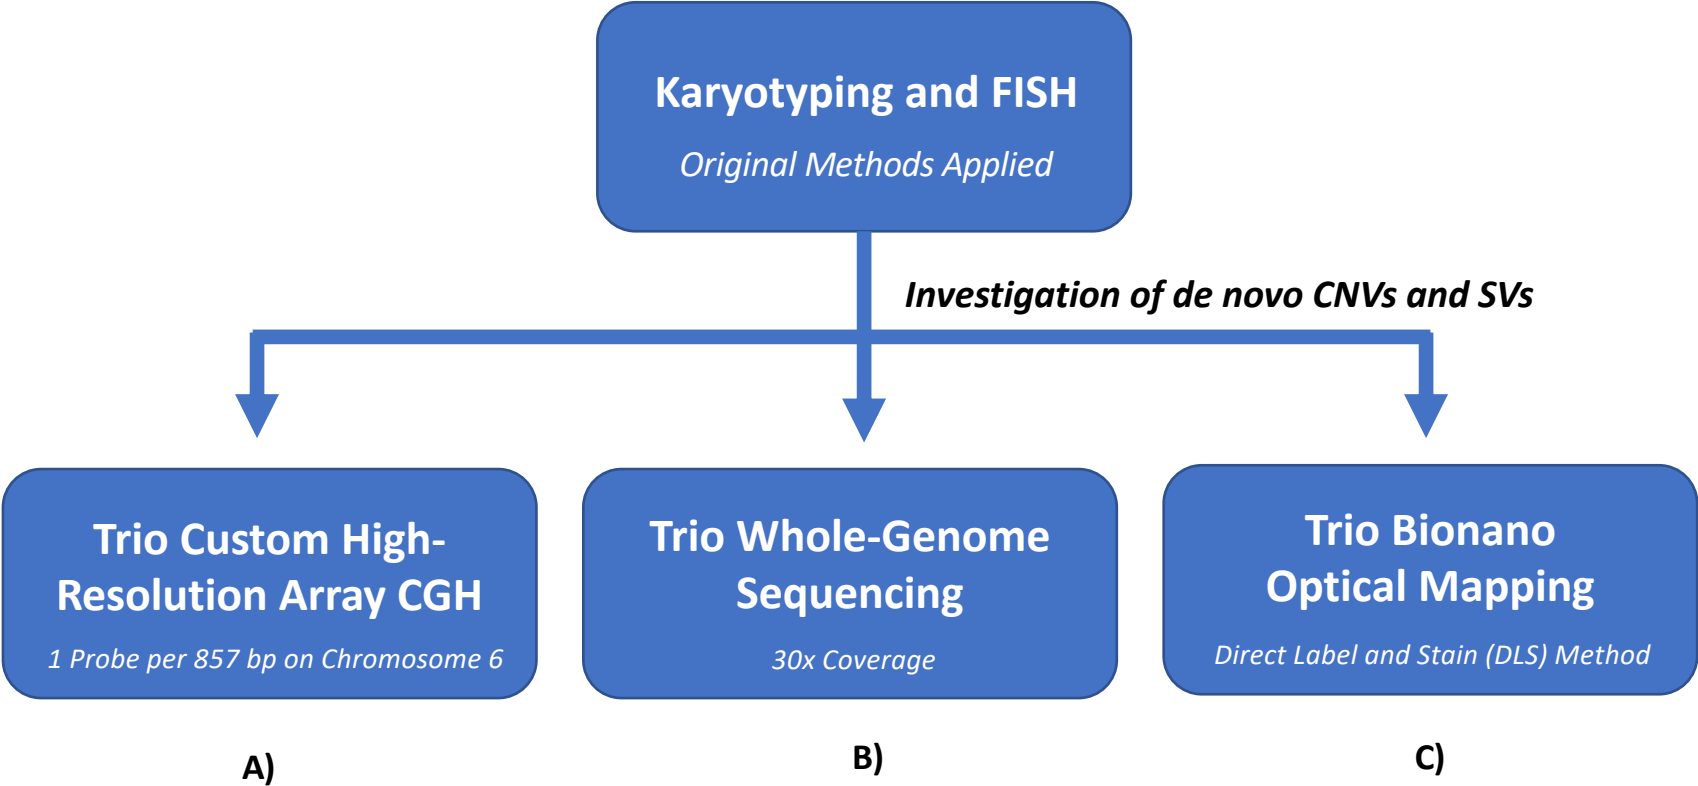

**Supplemental Figure 3:**

**(A)**

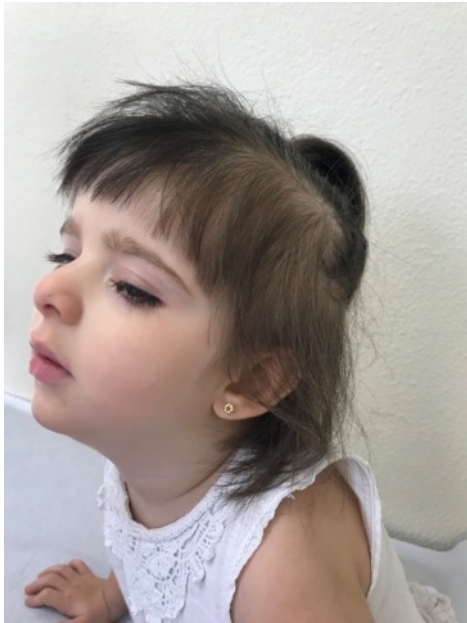

**(B)**

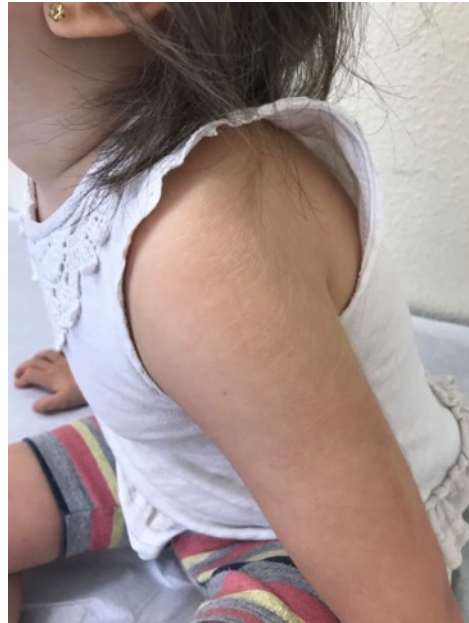

**(C)**

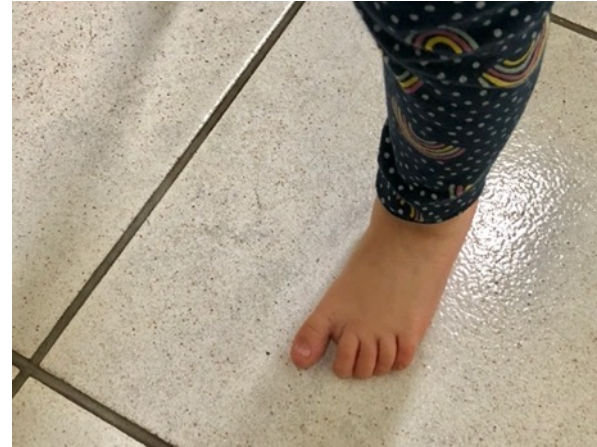

Supplemental Figure 4:

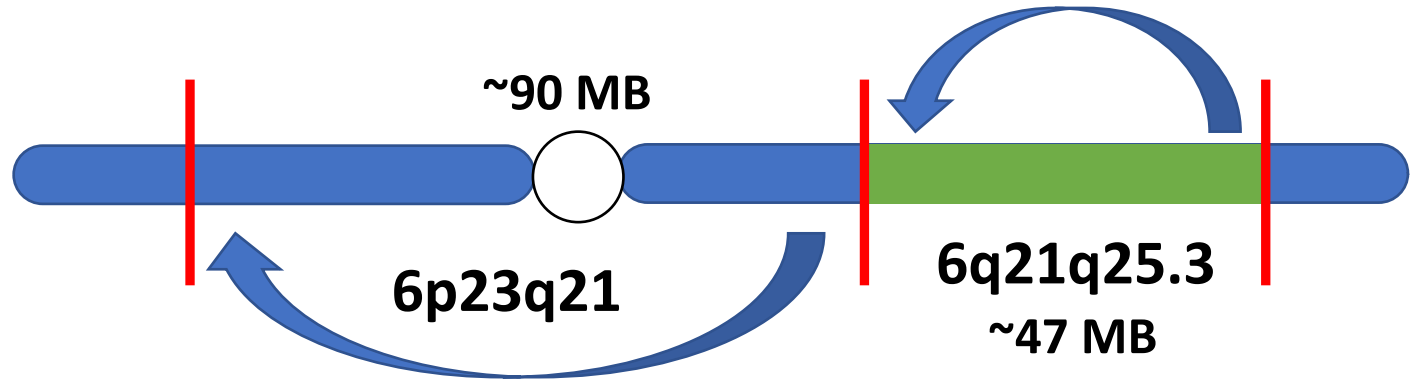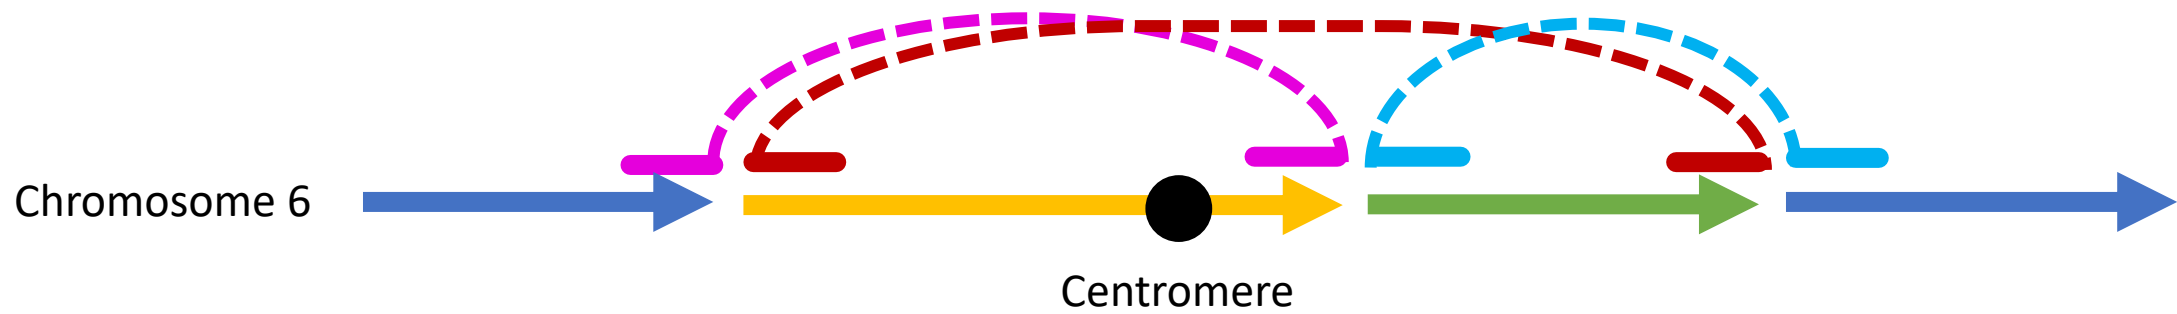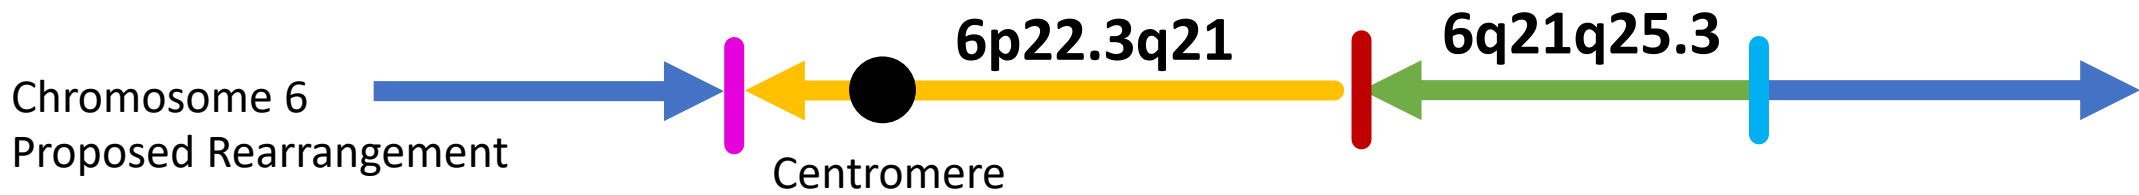

Supplemental Figure 5:

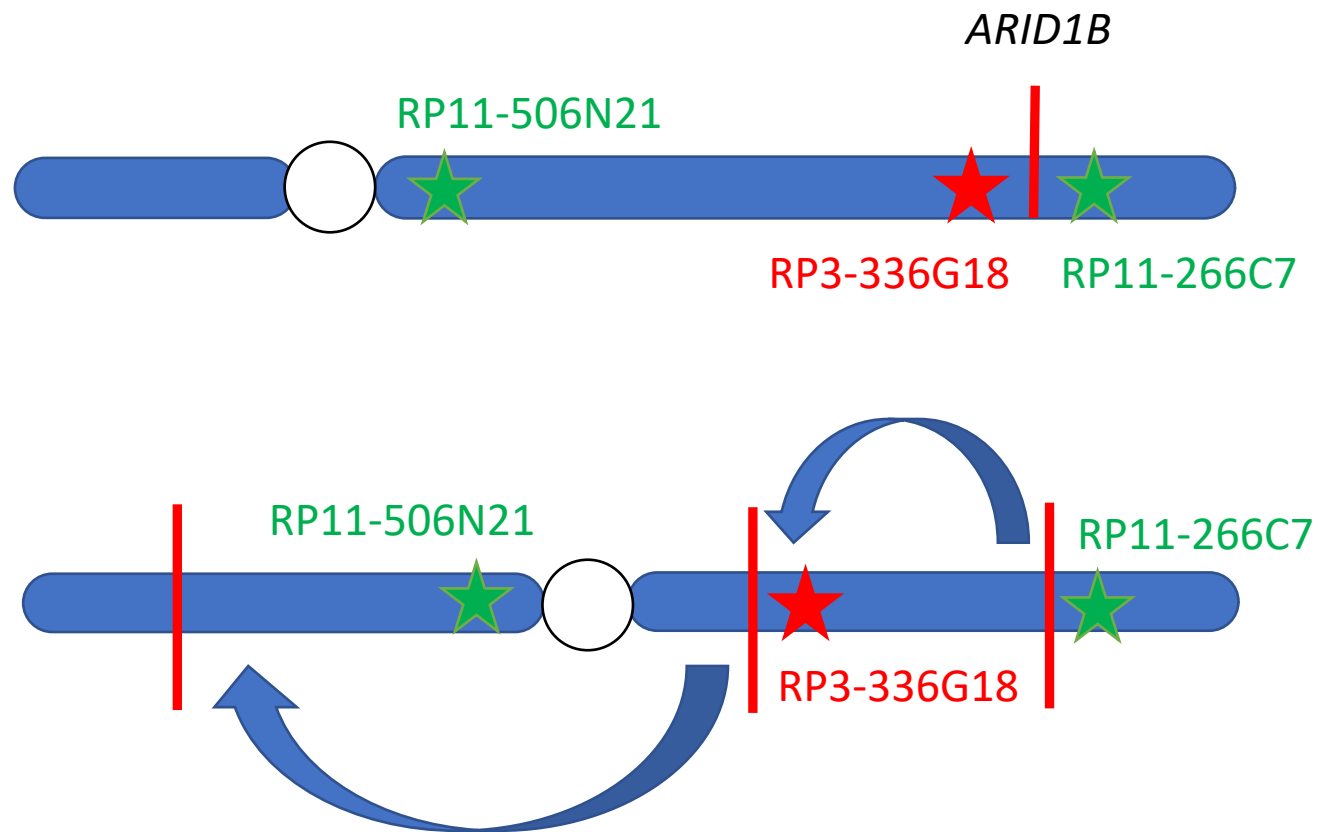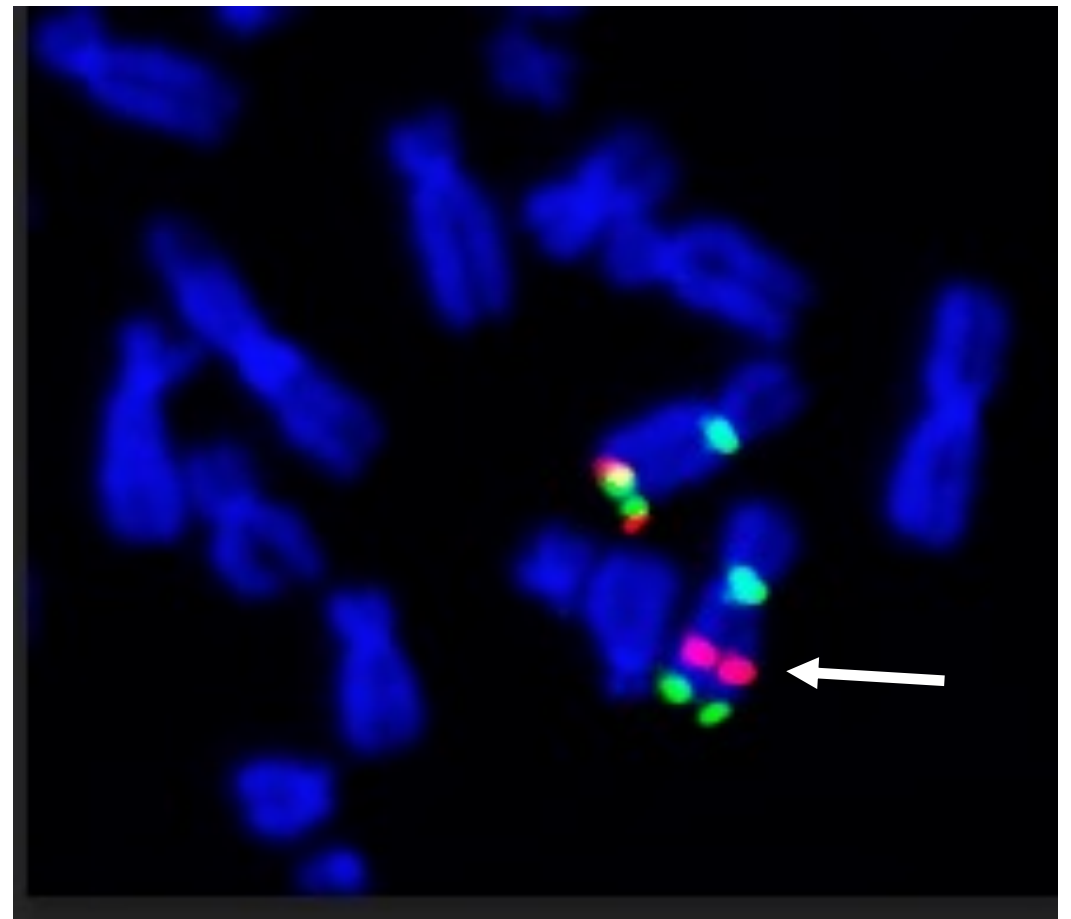

# Supplemental Figure 6:

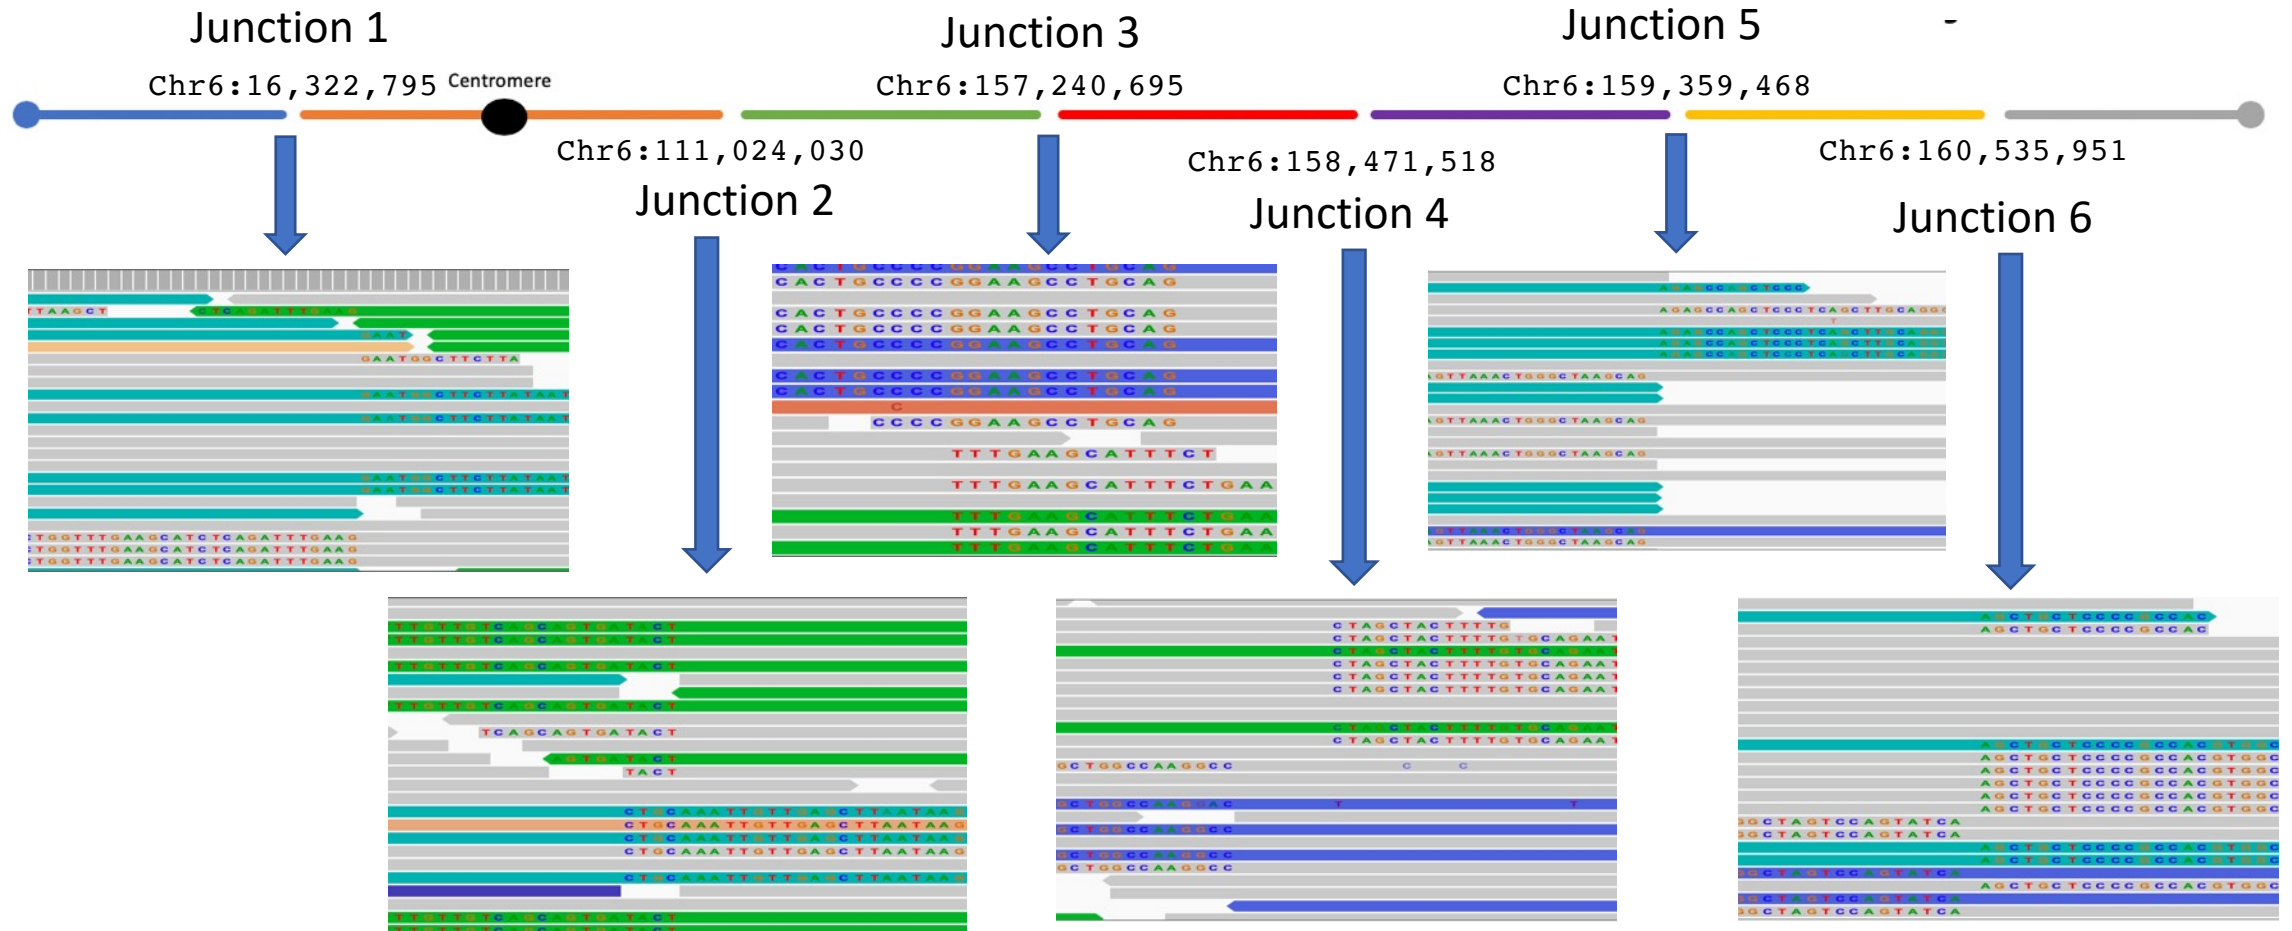



# Supplemental Figure 7:

(A)

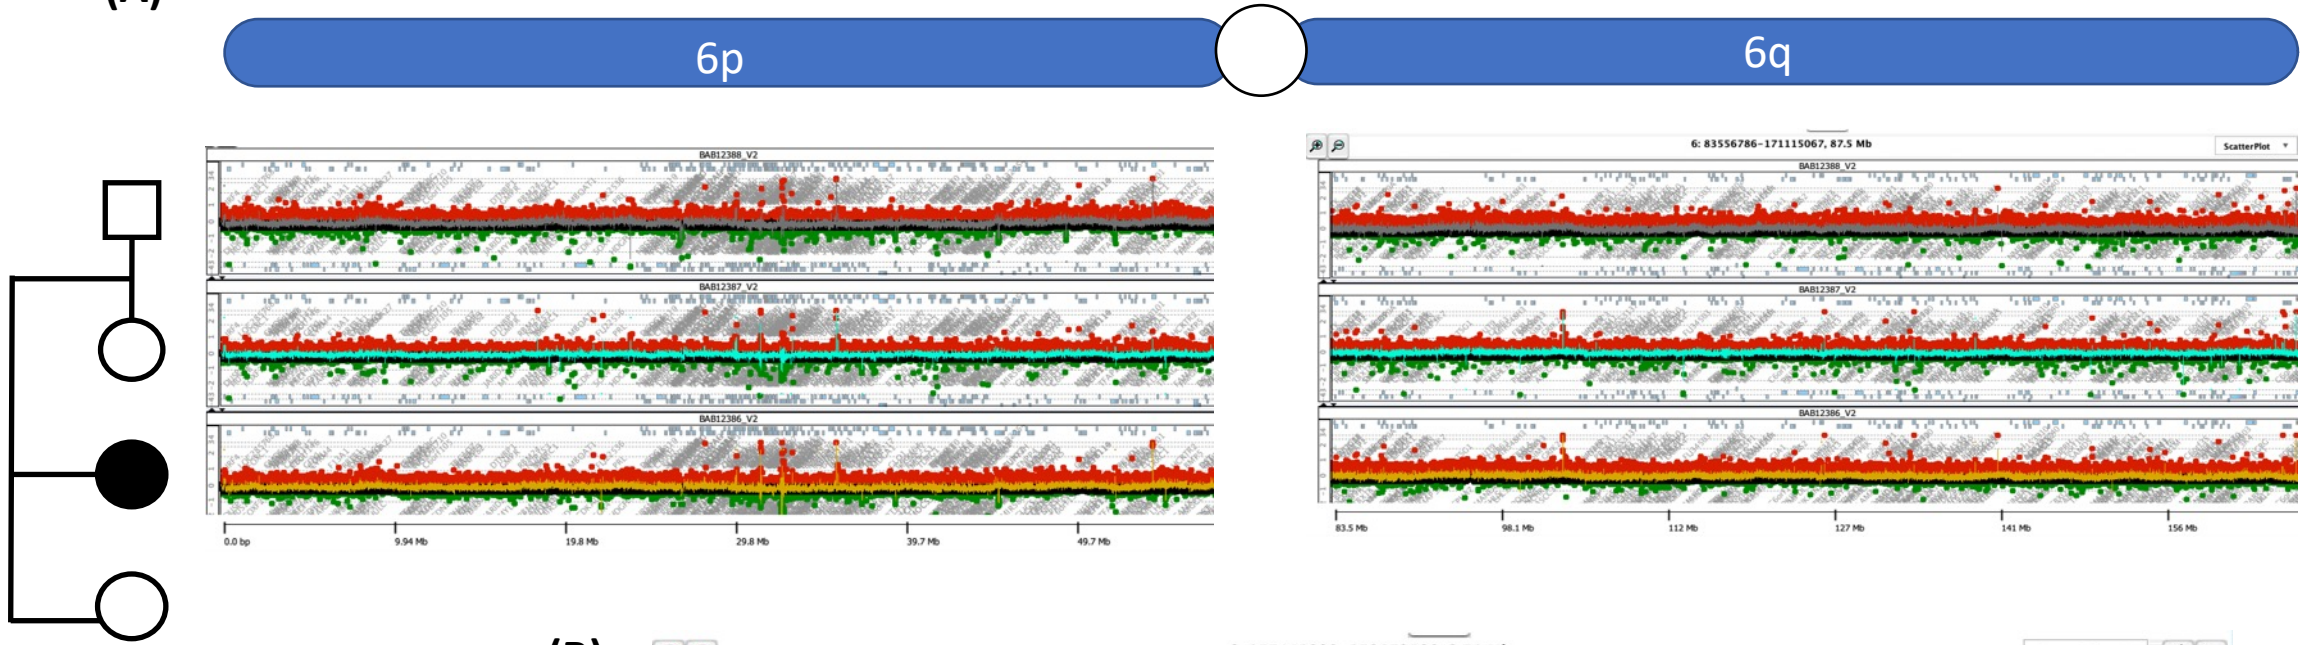

(B)

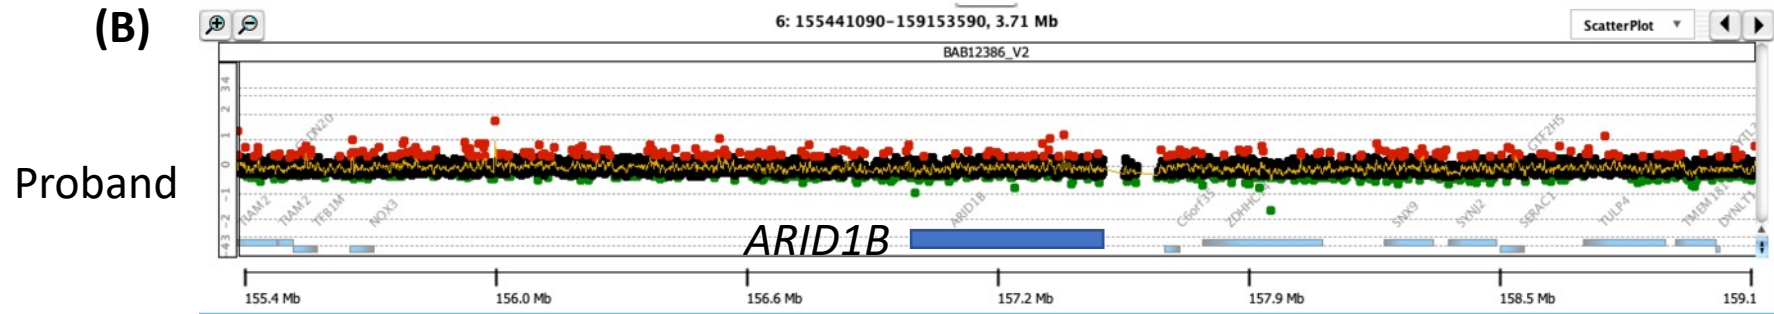

Chromosome 6  
Median Probe  
Spacing: 857 bp

# Supplemental Figure 8:

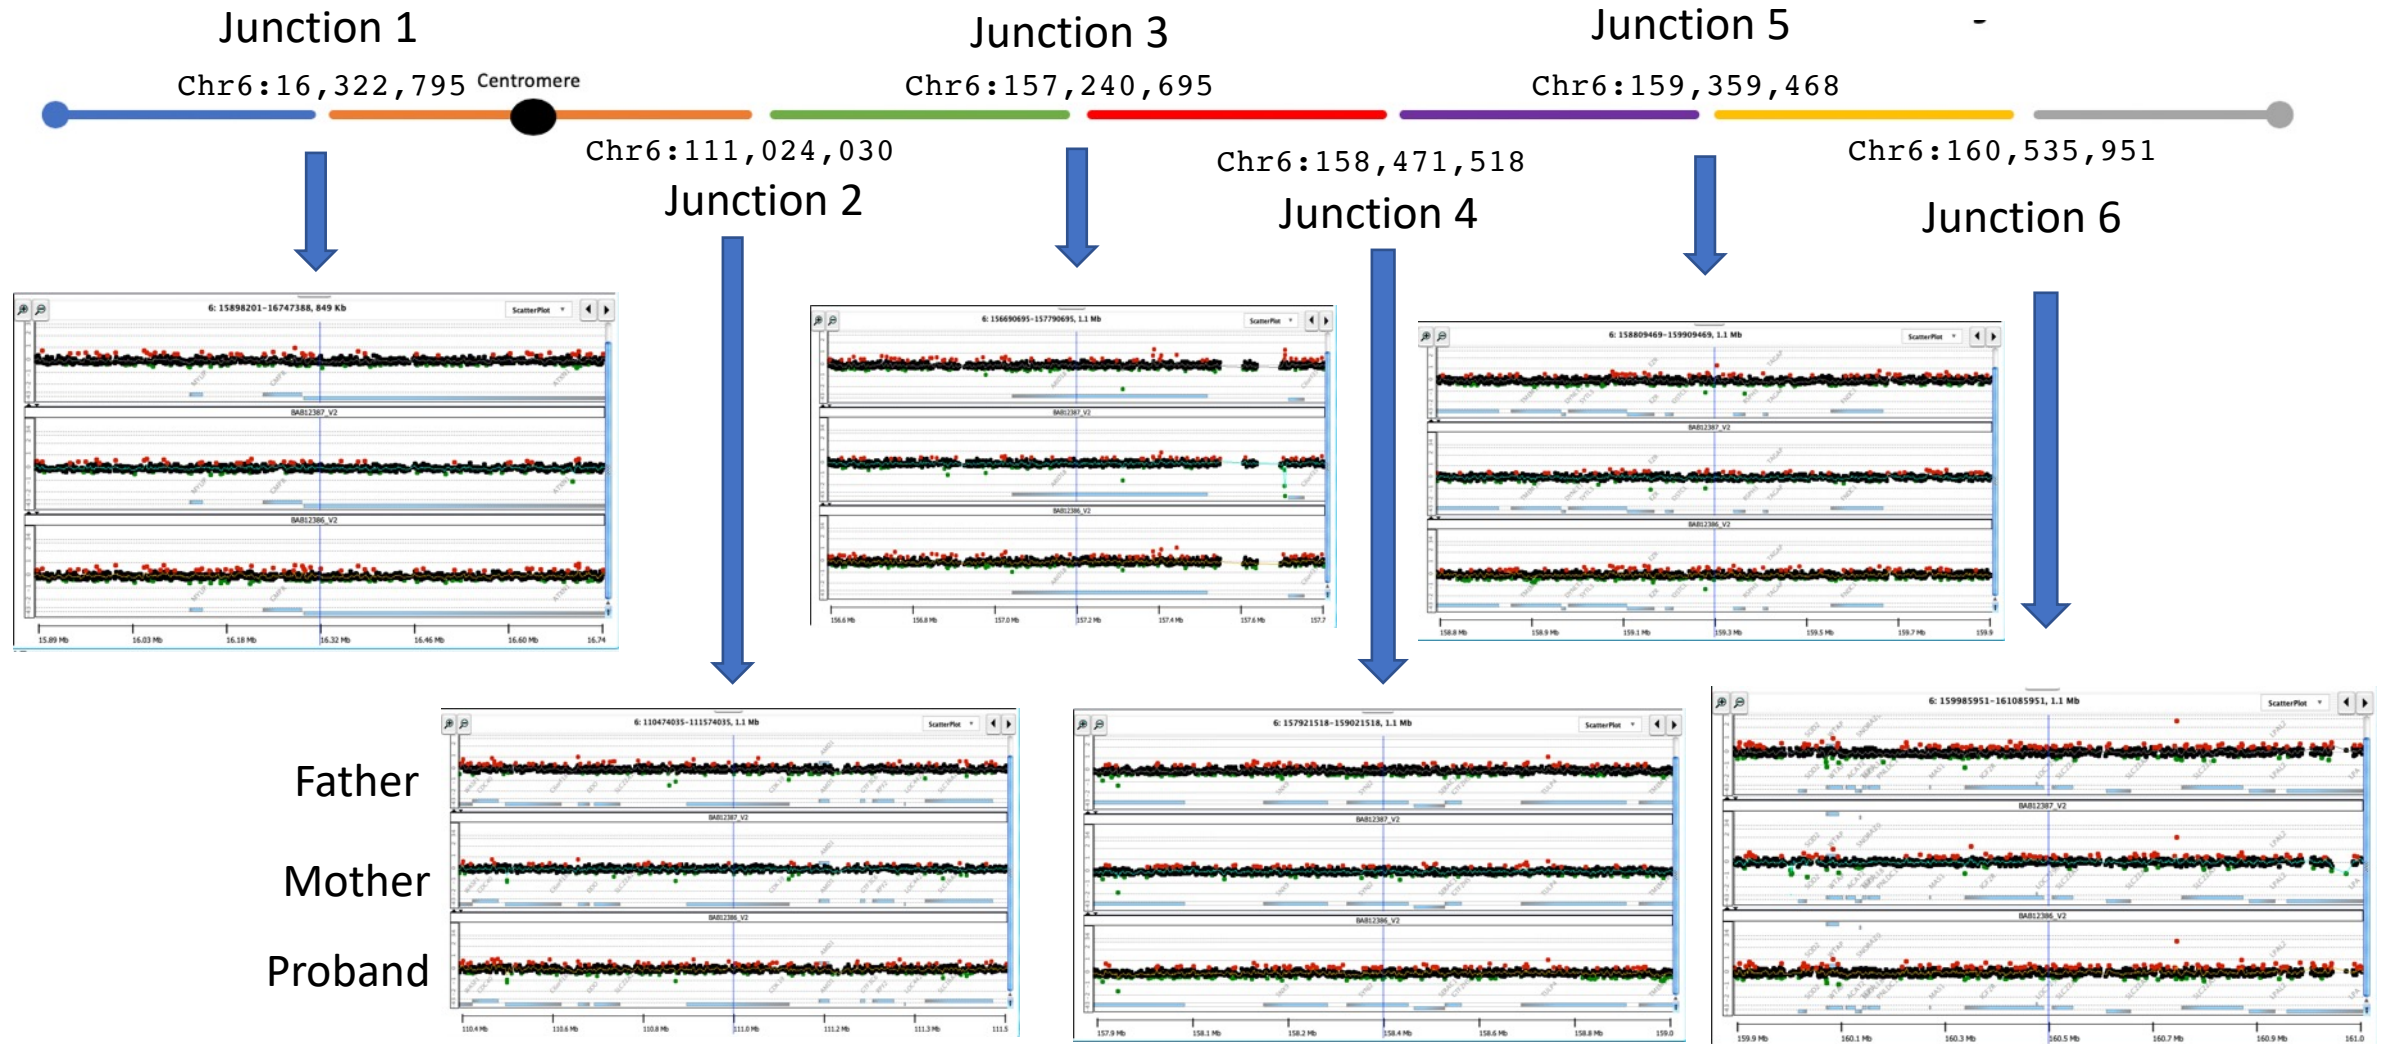



# Supplemental Figure 9:

Chr6:16,322,795 (+)

AATCAAATTTGTGATTTTGCATTATAAGCTCAACAATTTGCACATTTCTGAATTTCTCTGTGGGTGCAGTGTGACAGTGCCTAACAGTT  
 AATCAA-----TTTGCATTATAAGCTCAACAATTTGCACAATGGCTTCTTATAATGACGTTTTTTGTGCATGTACCATTACATATGT  
 CTTCTTTAACACCTGGTCATTTCTGCACAAAAGTAGCTAGTAAAAATGGCTTCTTATAATGACGTTTTTTGTGCATGTACCATTACATATGT

(-) Chr6:111,024,030

(+) Chr6:111,024,035

ATGGTACATGCACAAAAACGTCATTATAAGAAGCCATTTTACTAGCTACTTTTGTGCAGAATGACCAGGTGTTAAAGAAGACAAAGGTT  
 TTAGTTCTCTGAGGTAGAAAGGTTTGTGTGTCAGCAGTGATACTCTAGCTACTTTTGTGCAGAATGACCAGGTGTTAAAGAAGACAAAGGTT  
 TTAGTTCTCTGAGGTAGAAAGGTTTGTGTGTCAGCAGTGATACTGGACTAGCCACTGCAGGGGATATTGACCATGCCTGTGACAGTTGGGCC

Chr6:158,471,524 (+)

(+) Chr6:16,322,796

CCCCAATCAAATTTGTGATTTTGCATTATAAGCTCAACAATTTGCACATTTCTGAATTTCTCTGTGGGTGCAGTGTGACAGTGCCTAAC  
 GTGTGTGGCCAGCTGTGTCCTGGTTTGAAGCATCTCAGATTGAAGCATTTCTGAATTTCTCTGTGGGTGCAGTGTGACAGTGCCTAAC  
 GTGTGTGGCCAGCTGTGTCCTGGTTTGAAGCATCTCAGACACTGTTGGGCAGCTGCTTAGCCAGTTTAACTGAAATGTGGAGGAGATCAC

Chr6:157,240,695 (+)

Chr6:158,471,518 (+)

GACTTCTTAGTTCTCTGAGGTAGAAAGGTTTGTGTGTCAGCAGTGTGATACTGGACTAGCCACTGCAGGGGATATTGACCATGCCTGTGACAGT  
 ACCACTGCAGTGTGGGAGCCCCCTTCTGGGCTGGCCAAGGCCGAGACTGGACTAGCCACTGCAGGGGATATTGACCATGCCTGTGACAGT  
 ACCACTGCAGTGTGGGAGCCCCCTTCTGGGCTGGCCAAGGCCAGAGCCAGCTCCCTCAGCTTGCAGGGAGGTGTGGAGGGAGAGGCGCGAG

Chr6:160,535,951 (-)

(+) Chr6:157,240,708

CAGCTGTGTCCTGGTTTGAAGCATCTCAGACACTGTTGGGCAGCTGCTTAGCCAGTTTAACTGAAATGTGGAGGAGATCACATCAGCTGG  
 CCACAGTCTCAGCTGGGACTTCACTGCCCCGGAAGCCTGCAGGCTGCTTAGCCAGTTTAACTGAAATGTGGAGGAGATCACATCAGCTGG  
 CCACAGTCTCAGCTGGGACTTCACTGCCCCGGAAGCCTGCAGGAGCTGCTCCCGCCACGTGGCTCTGATCCTCTACTACTGTGCTGACCT

(-) Chr6:159,359,470

Chr6:160,535,951 (+)

TCTCCCTCCACACCTCCCTGCAAGCTGAGGGAGCTGGCTCTGGCTTGGCCAGCCAGAAAGGGGCTCCACAGTGCAGTGGTGGGCTGAA  
 TCTCCCTCCACACCTCCCTGCAAGCTGAGGGAGCTGGCTCTGAGCTGCTCCCGCCACGTGGCTCTGATCCTCTACTACTGTGCTGACCTG  
 CACAGTCTCAGCTGGGACTTCACTGCCCCGGAAGCCTGCAGGAGCTGCTCCCGCCACGTGGCTCTGATCCTCTACTACTGTGCTGACCTG

(-) Chr6:159,359,468

## Reference Chromosome 6

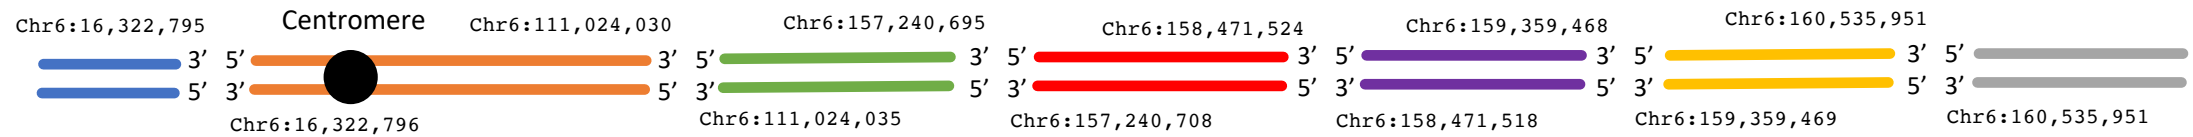

## Derivative Chromosome 6

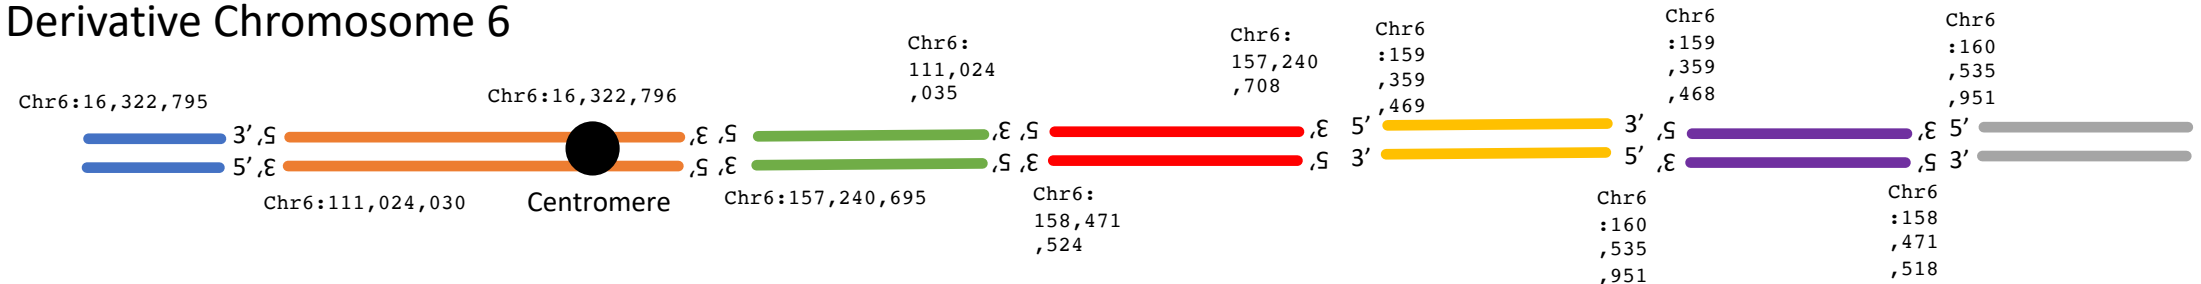

Supplemental Figure 10:

# Junction 1

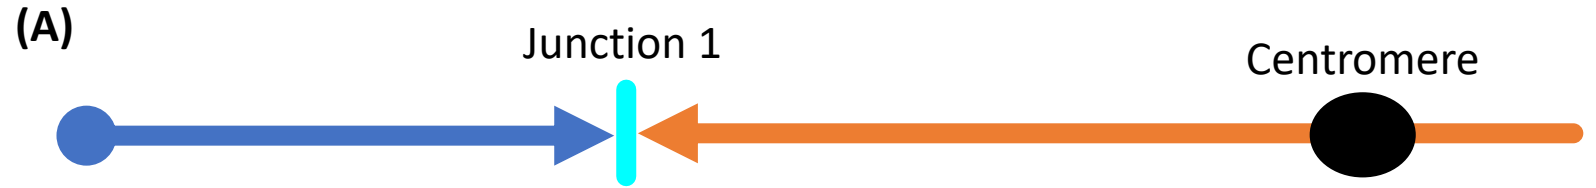

(B)

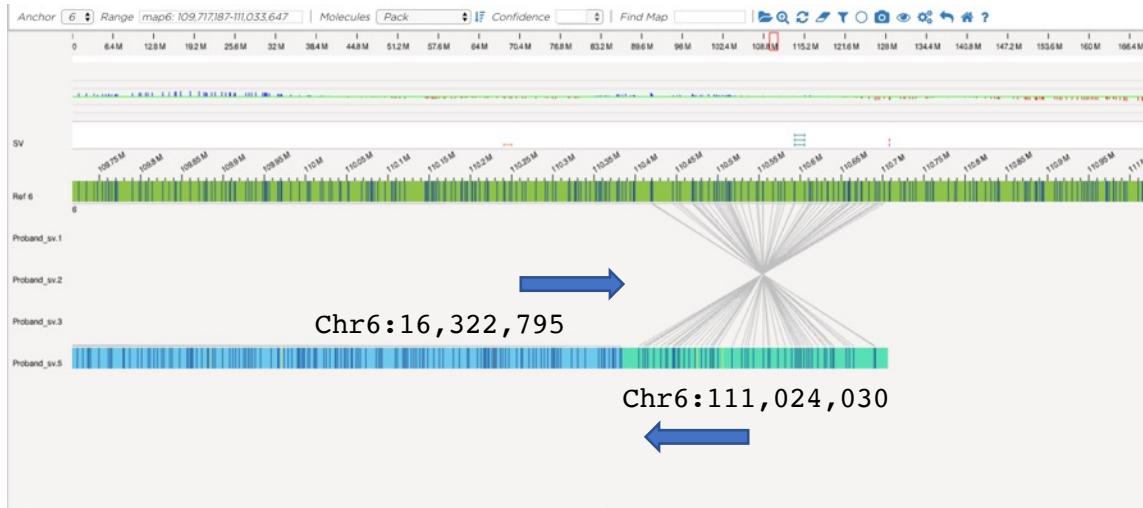

Supplemental Figure 11:

# Junction 1

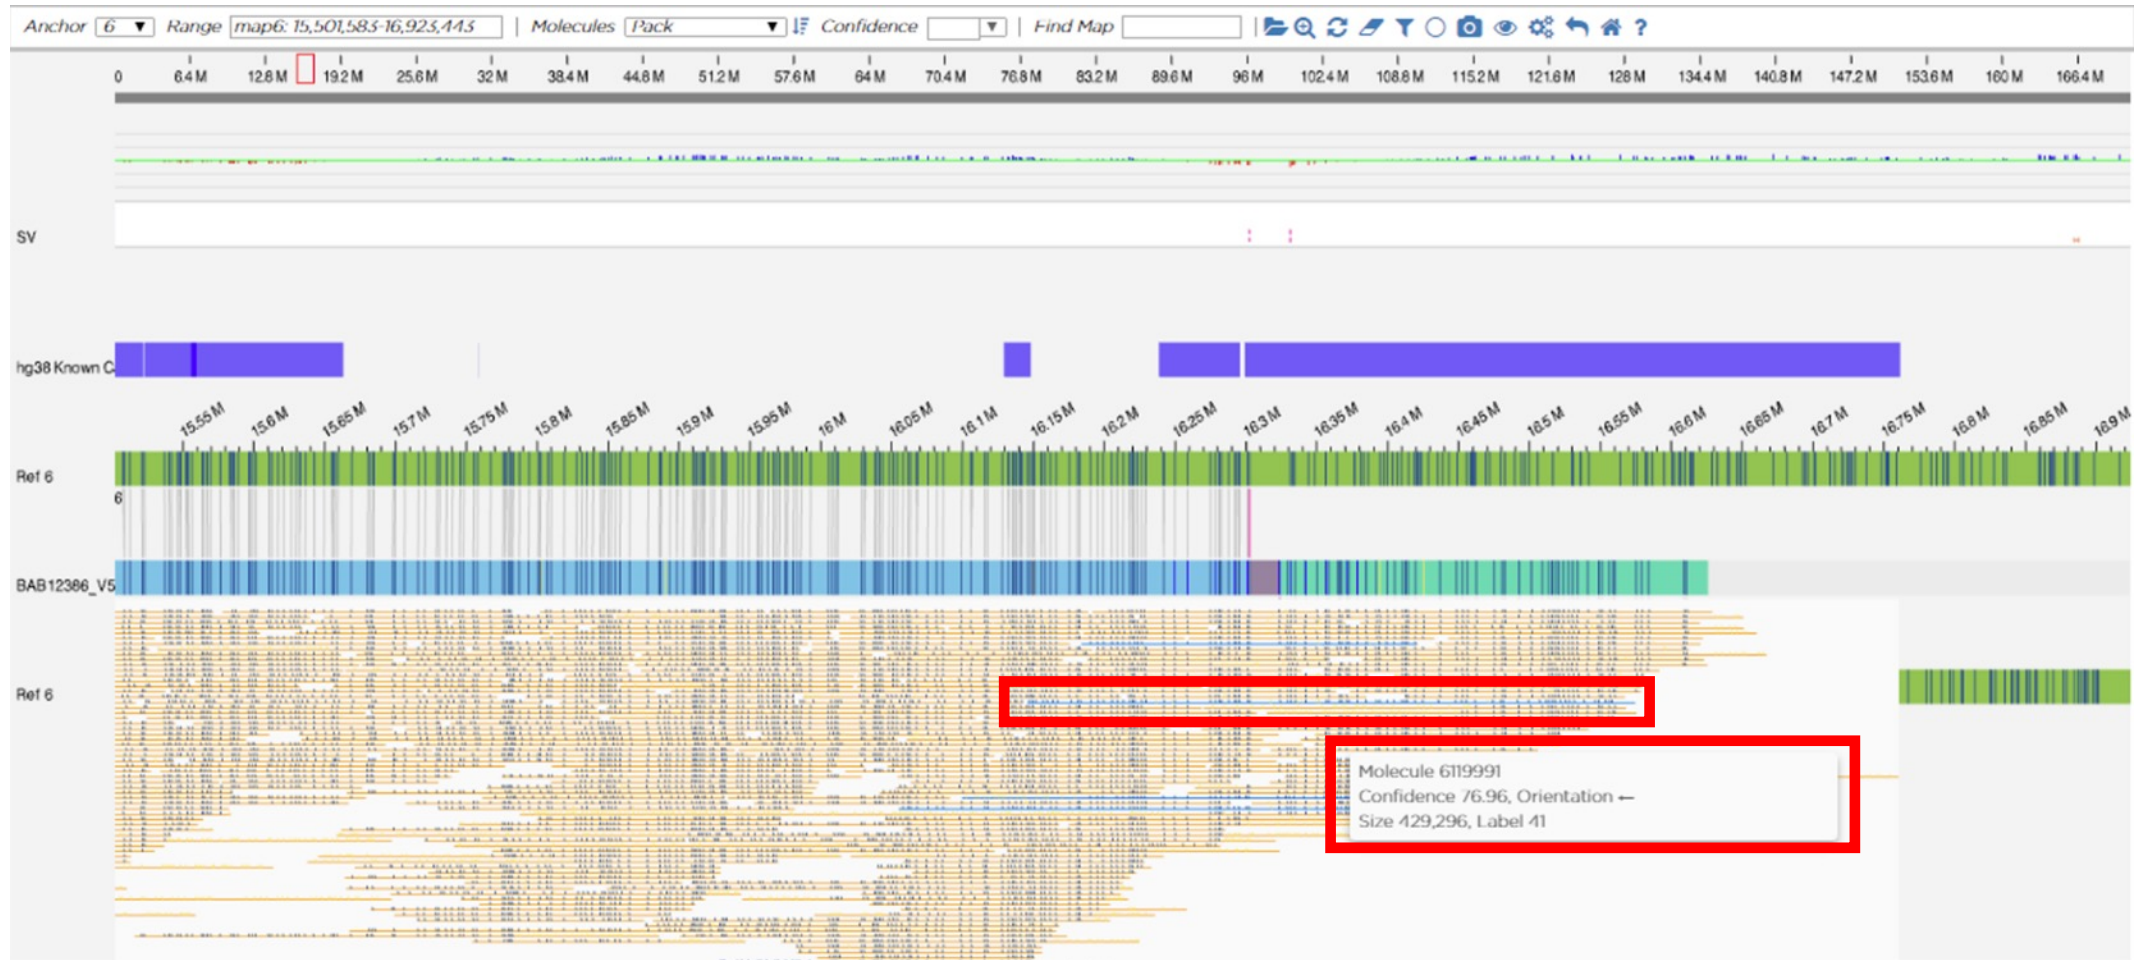

Supplemental Figure 12:

# Junction 2

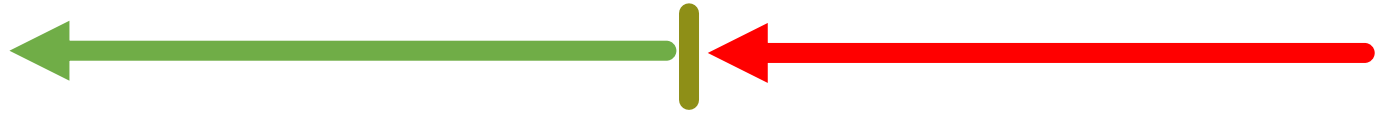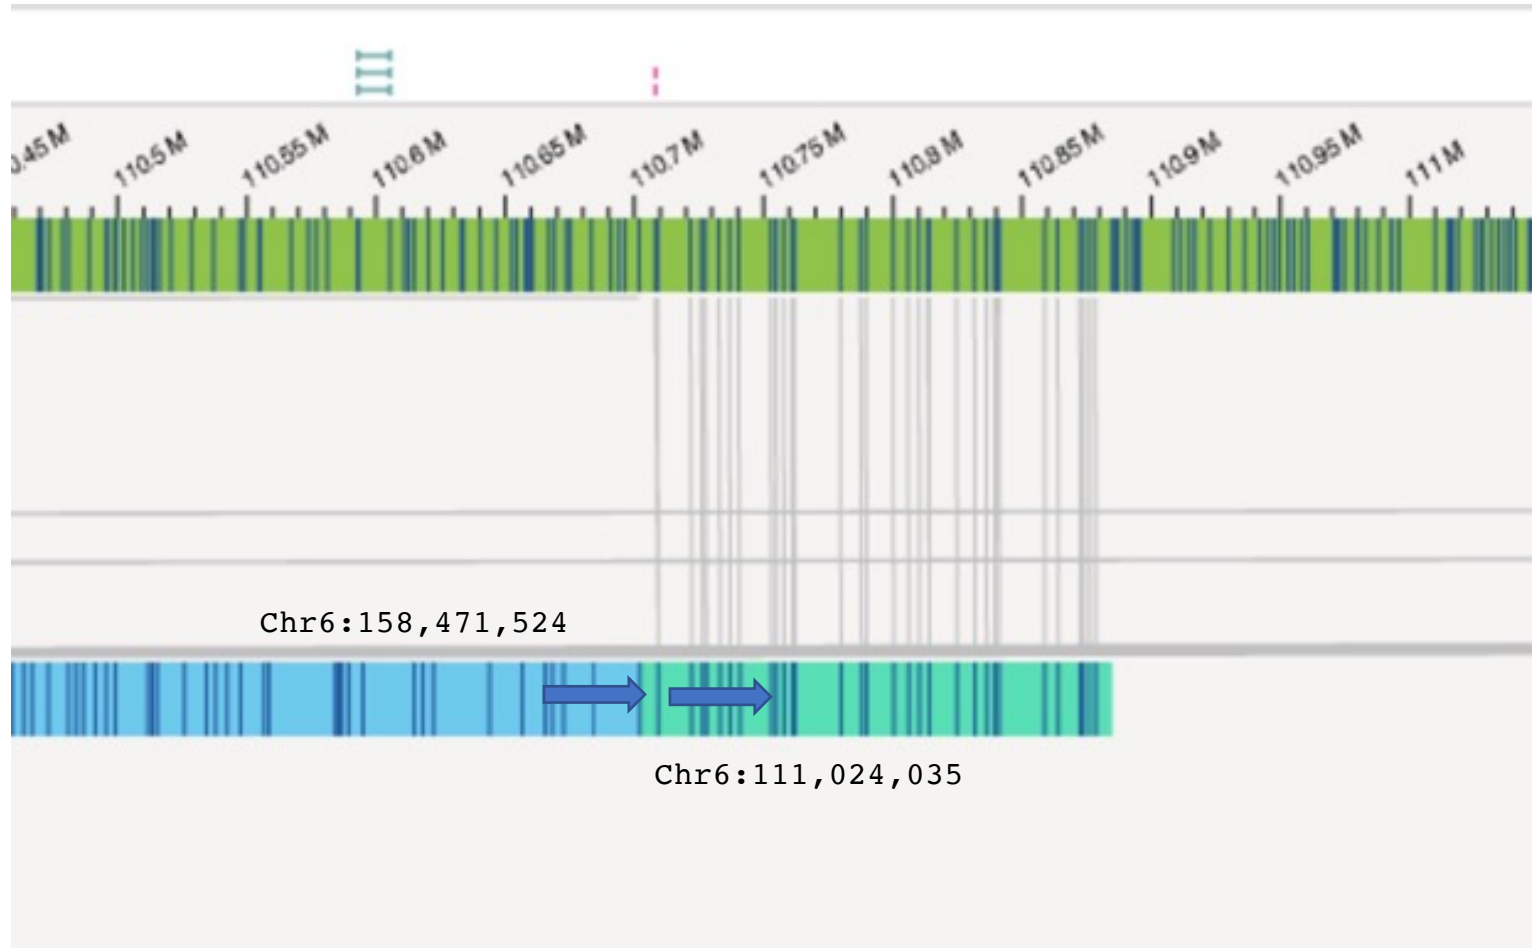

Supplemental Figure 13:

# Junction 3

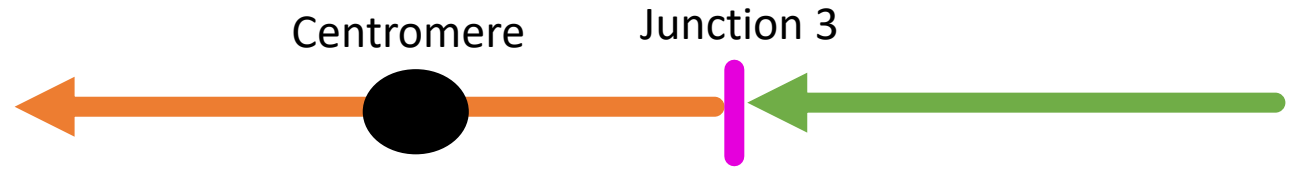

(A)

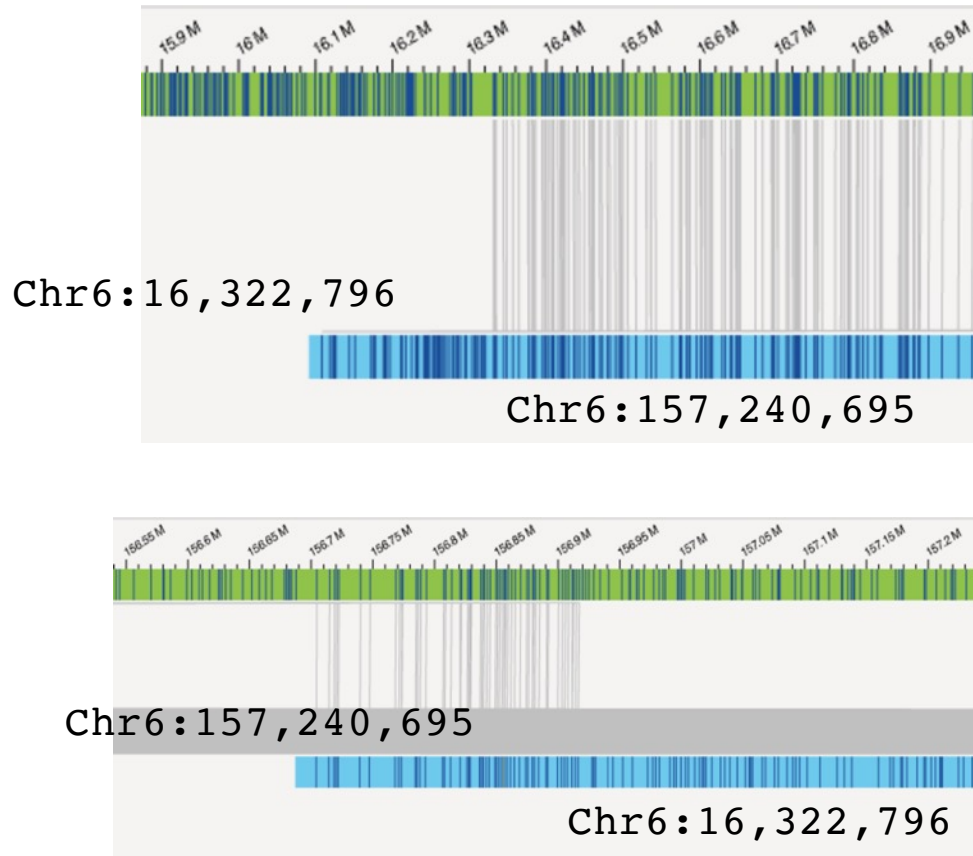

(B)

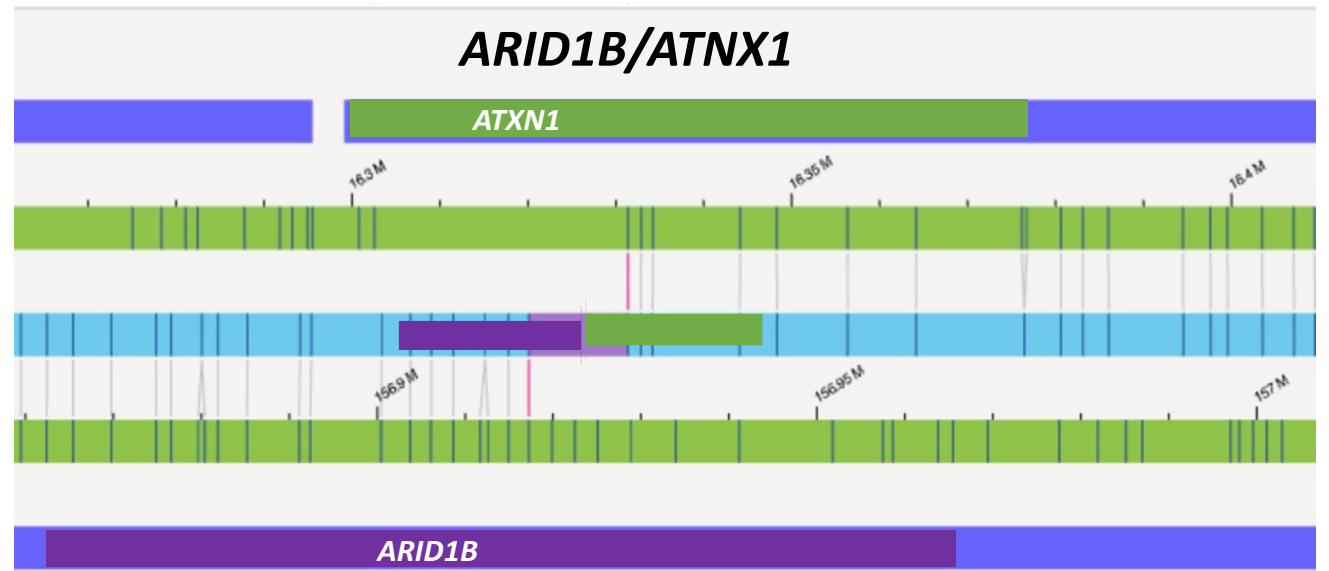



Supplemental Figure 14:

# Junction 4

Junction 4

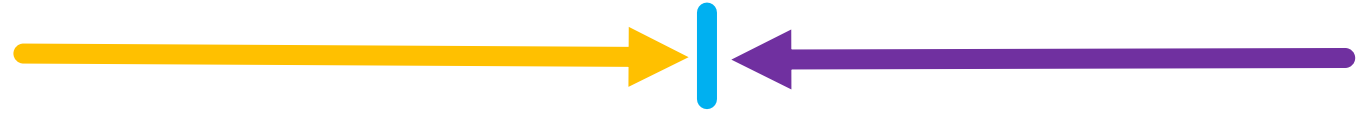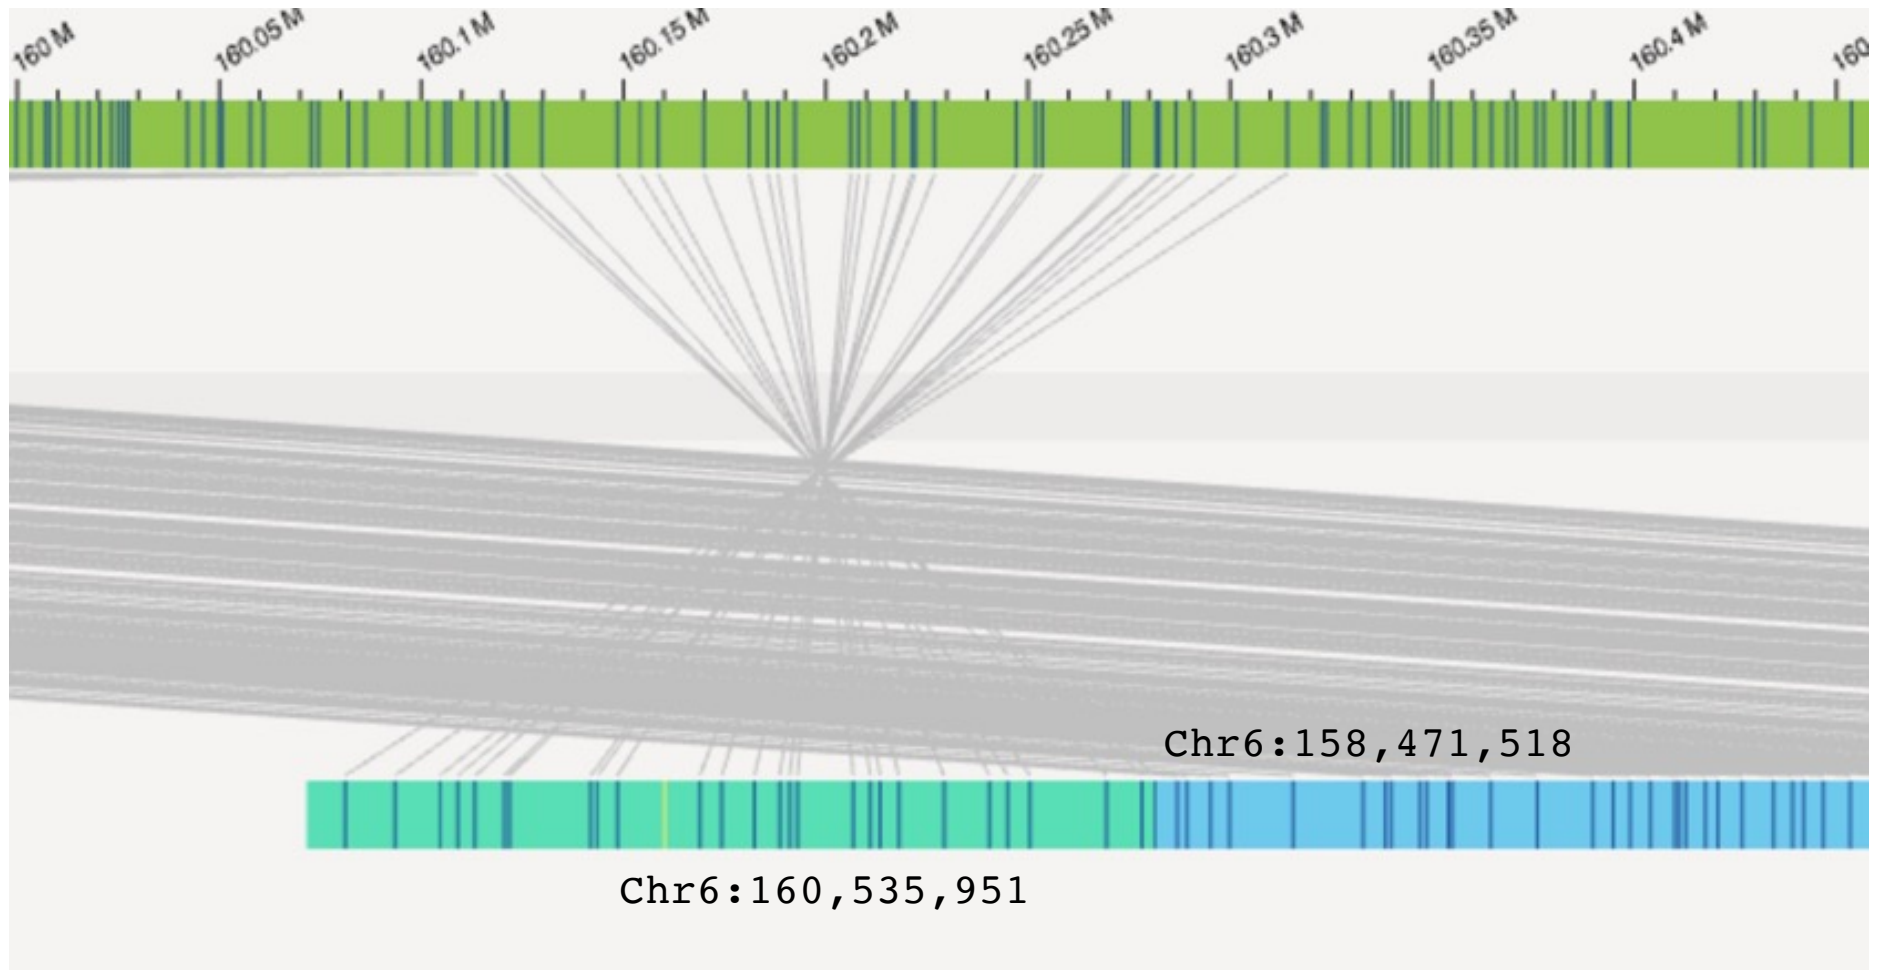

Supplemental Figure 15:

Junction 5

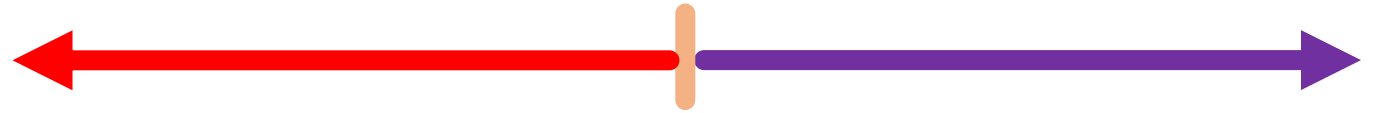

Junction 5

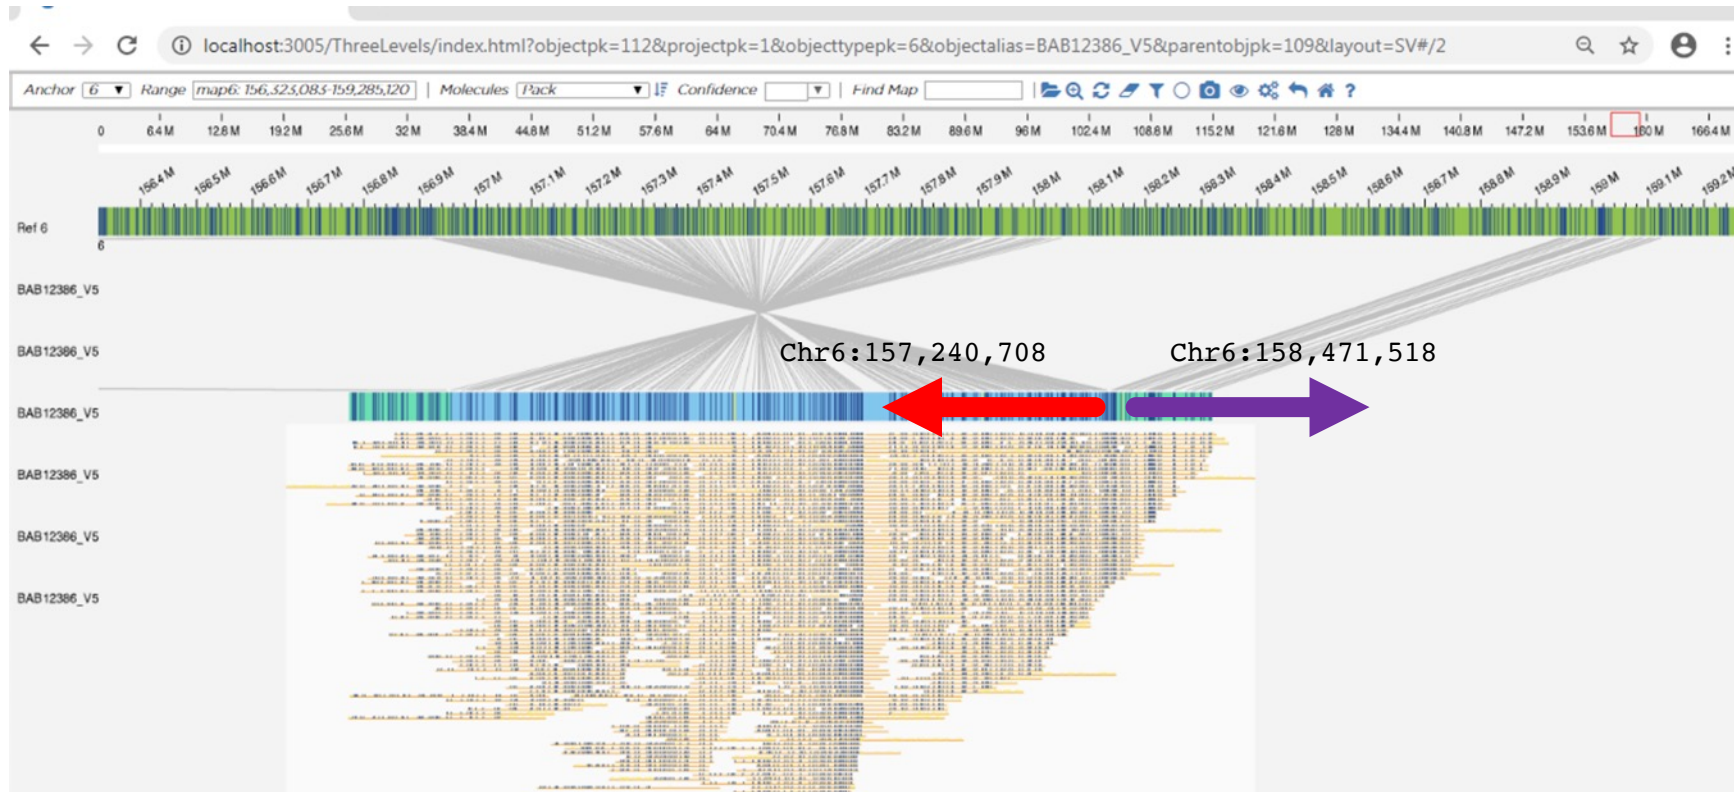

Supplemental Figure 16:

Junction 6

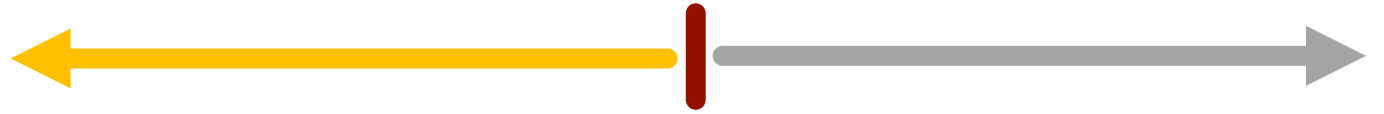

# Junction 6

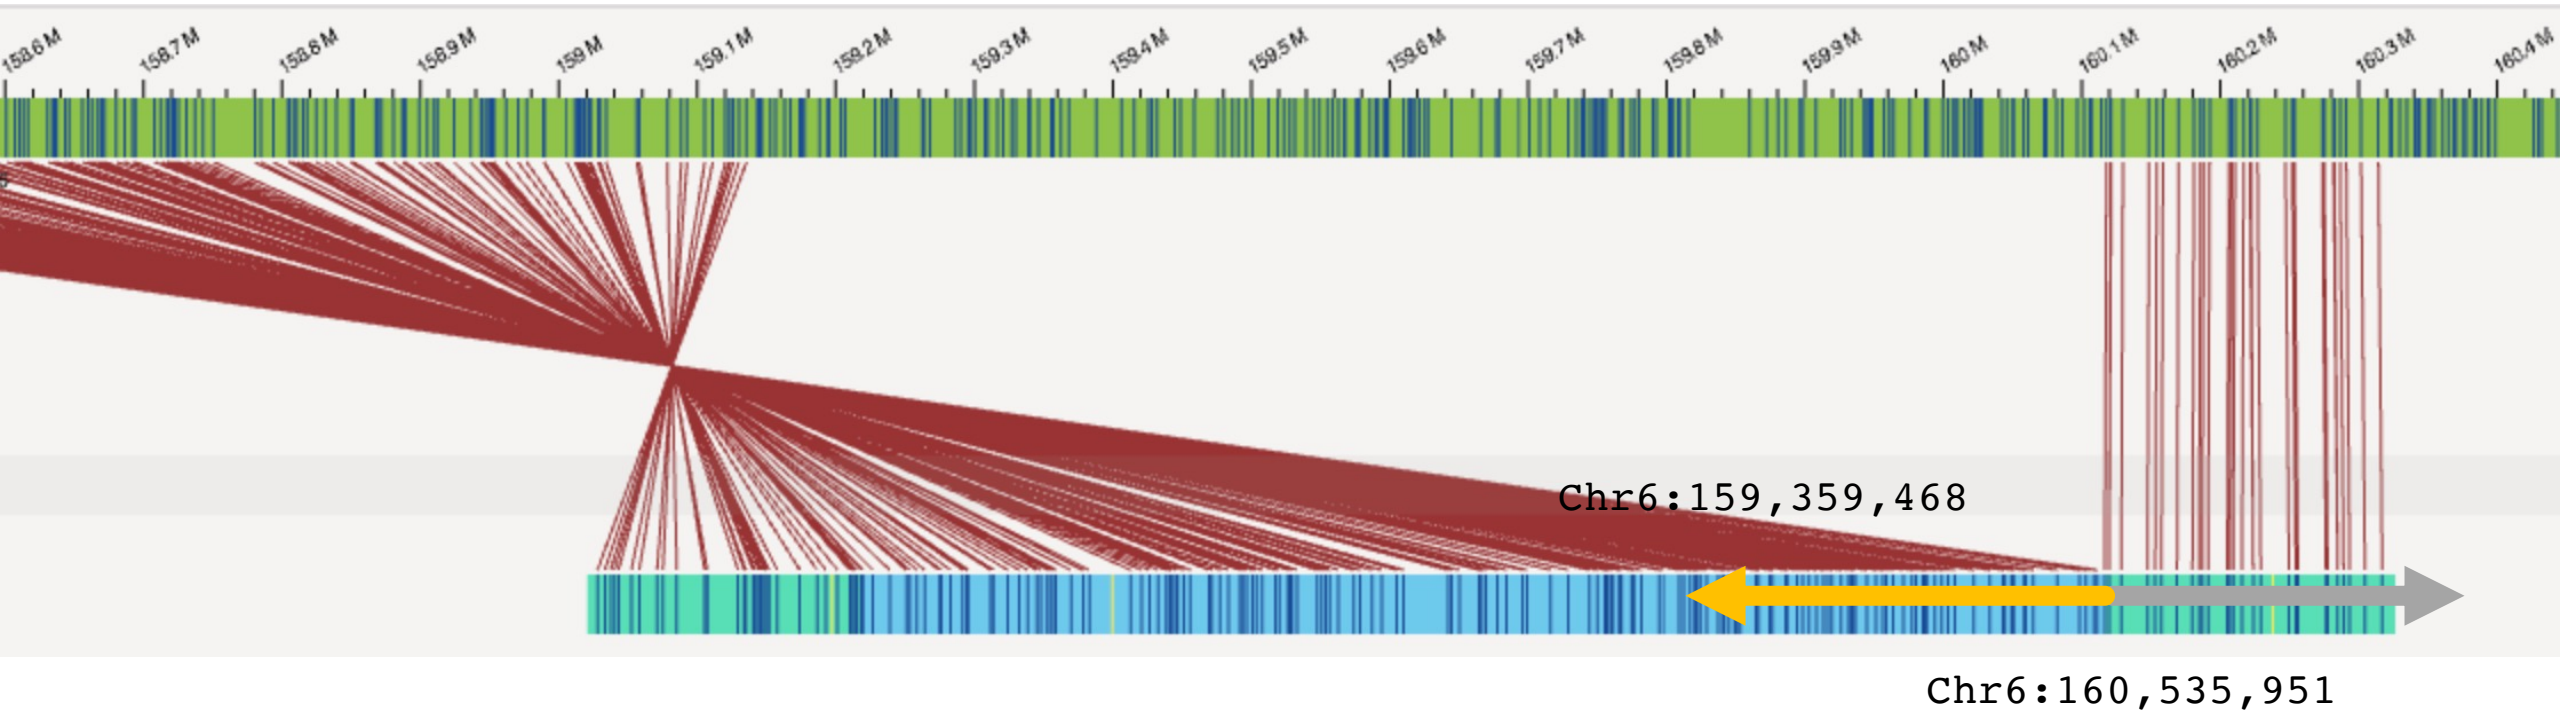

Supplemental Figure 17:

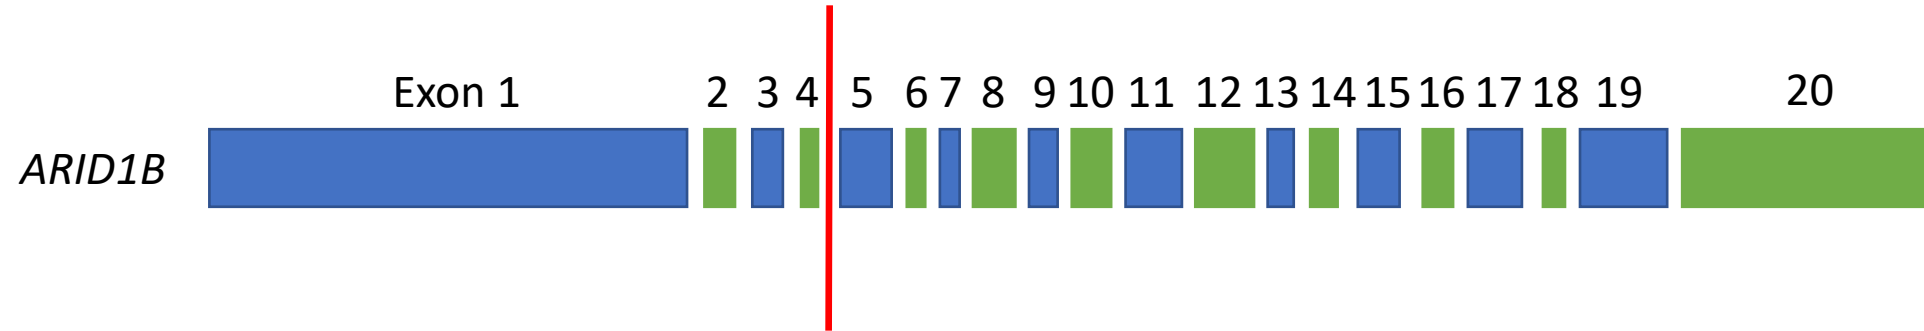

**Supplemental Figure 18:**

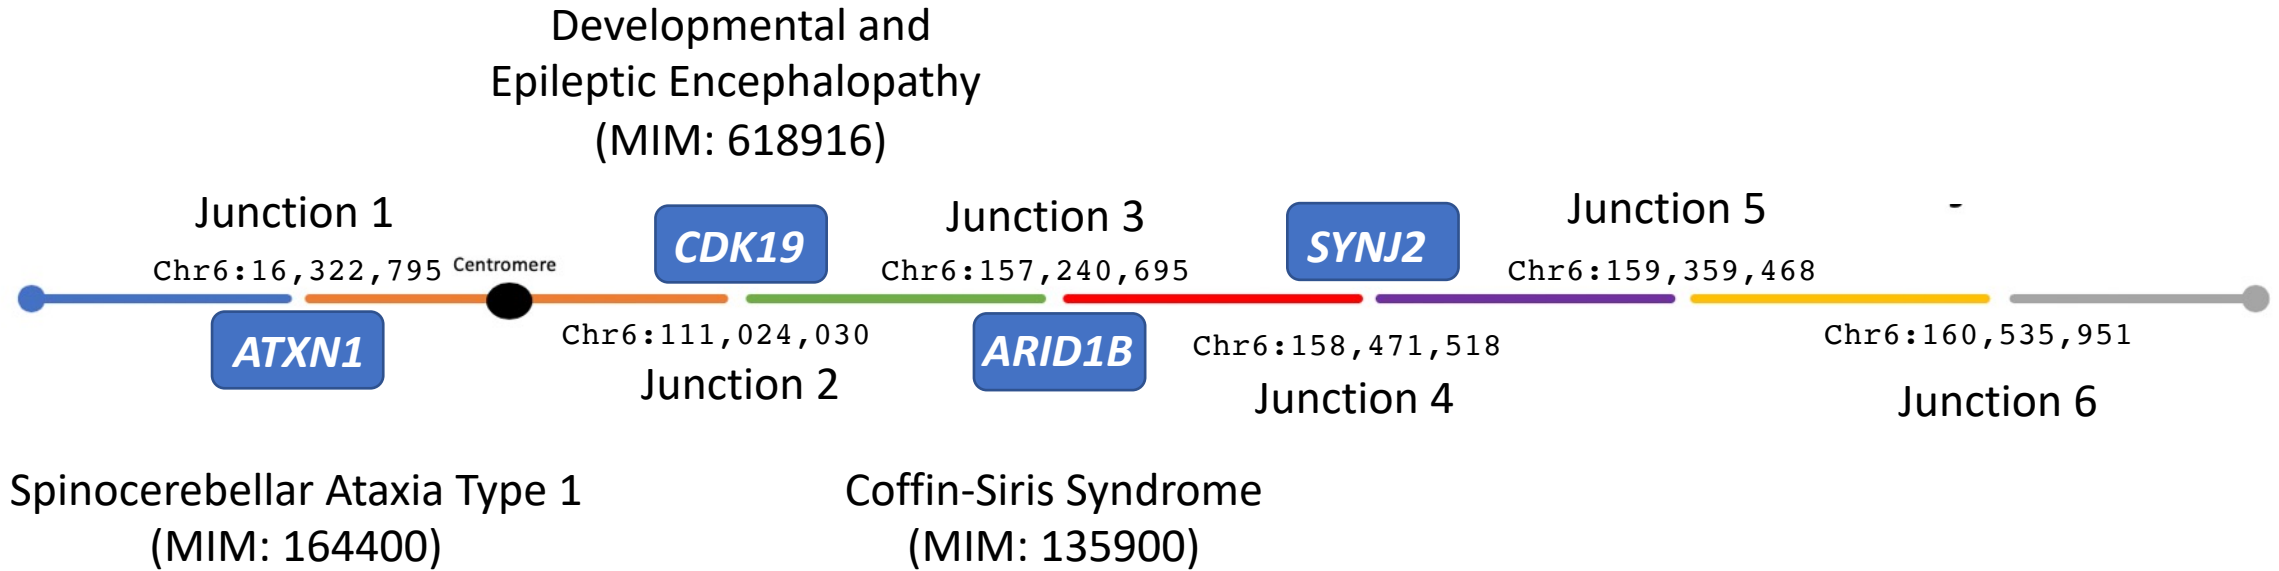

Supplement: Data_Sheet_1.pdf [file Data_Sheet_1.pdf]
